# Supplementary material
Source: Royal Society of Chemistry journal article supplement (doi:10.1039/d6nr00685j)
Supplement: d6nr00685j1.pdf [file d6nr00685j1.pdf]

## Supplementary Information

### Defect Engineering of VN Nanowires Enables Dual-Mode SERS-Colorimetric Quantification of Glutathione in Serum

*Yao Liu<sup>a</sup>, Chao Yang<sup>a</sup>, Fei Li,<sup>a</sup> Shan Liang<sup>a,\*</sup>, Xianyin Song<sup>c</sup>, Yawei Lv<sup>b,\*</sup>, Xingang Zhang<sup>a,\*</sup>, Changzhong Jiang<sup>c</sup>*

<sup>a</sup>Key Laboratory of Low-Dimensional Quantum Structures and Quantum Control of Ministry of Education, Key Laboratory for Matter Microstructure and Function of Hunan Province, Department of Physics and Synergetic Innovation Center for Quantum Effects and Applications, School of Physics and Electronics, Hunan Normal University, Changsha 410081, China

<sup>b</sup>School of Physics and Electronics, Hunan University, Changsha 410082, China

<sup>c</sup>College of Materials Science and Engineering, Hunan University, Changsha 410082, China

E-mail: zxcg@hunnu.edu.cn; liangshan@hunnu.edu.cn; lvyawei@hnu.edu.cn

## Experimental Section

### Synthesis of V-MOF Nanowires

The synthesis involved dissolving  $VCl_3$  (0.025 g) and terephthalic acid (0.026 g) in 40 mL deionized water under 30 min magnetic stirring at room temperature. After CTAB addition, the solution underwent hydrothermal treatment in a Teflon-lined autoclave (200 °C, 48 h). The resulting product was purified through sequential washing with deionized water and anhydrous ethanol to obtain V-MOF nanowires.

### Synthesis of VN@C Nanowires

The thermal treatment involved loading 0.03 g V-MOF nanowires into an alumina crucible within a controlled atmosphere furnace. After 30 min Ar purging, pyrolysis was conducted under flowing  $NH_3$  ( $0.4\text{ L min}^{-1}$ ) with a  $5\text{ °C min}^{-1}$  to 500 °C (4 h dwell). Post-annealing cooling under Ar yielded a black product, subsequently purified through sequential deionized water/ethanol washing cycles and ambient drying.

### Synthesis of P-VN@C Nanowires

The precursors (VN@C nanowires and  $NaH_2PO_2$  in 1:3 mass ratio) were spatially separated in an alumina boat. Following 30 minutes Ar purging, thermal treatment was conducted with a  $2\text{ °C min}^{-1}$  ramp to 300 °C (2 h dwell), followed by ambient cooling under Ar protection.

### Synthesis of $V_2O_5$ Nanowires

The precursor solution was prepared by dispersing  $V_2O_5$  (0.36 g) in deionized water (30 mL) with subsequent addition of 30%  $H_2O_2$  (10 mL) under 2 hours magnetic stirring at ambient temperature. The homogeneous mixture underwent hydrothermal crystallization in a PTFE-lined autoclave at 200°C for 96 h. Post-synthesis processing included six-cycle deionized water washing and lyophilization to obtain  $V_2O_5$  nanowires.

### Peroxidase-like Activity of P-VN@C

The peroxidase-like activity of P-VN@C was monitored by SERS. A mixture of TMB solution (200  $\mu\text{L}$ , 1 mM),  $H_2O_2$  (200  $\mu\text{L}$ , 1 mM), and P-VN@C dispersion (100  $\mu\text{L}$ ,  $0.5\text{ mg mL}^{-1}$ ) was prepared in acetate buffer (1.5 mL, pH = 4). After reacting at 37°C for 5 minutes, the oxidation of TMB was assessed by measuring the  $1623\text{ cm}^{-1}$  peak intensity in the SERS spectrum.

The peroxidase-like activity of P-VN@C was demonstrated by the accelerated oxidation of TMB from colorless to blue in the presence of  $H_2O_2$ , accompanied by an absorbance peak. In a 5 mL centrifuge tube, 100  $\mu\text{L}$  of  $0.5\text{ mg/mL}$  P-VN@C, 200  $\mu\text{L}$  of 1 mM TMB solution, 200  $\mu\text{L}$  of 1 mM  $H_2O_2$ , and 1.5 mL of pH 4.0 acetate buffer were sequentially added and incubated at 37°C for 5 minutes. The POD-like activity was then assessed using UV-Vis spectroscopy. A control experiment was performed by mixing P-VN@C or  $H_2O_2$  with TMB, and the UV absorbance spectra were collected for comparison.

### Aqueous Glutathione Detection

The reaction system was constructed by sequentially loading 100  $\mu\text{L}$  of  $0.5\text{ mg mL}^{-1}$  P-VN@C dispersion, 200  $\mu\text{L}$  each of 1 mM TMB and  $H_2O_2$  solutions, along with freshly prepared GSH solutions (variable concentrations) into a 5 mL centrifuge tube.

The mixture was buffered with 1.5 mL acetate buffer (pH 4.0) to achieve total 2 mL system volume. Following 60 minutes incubation at 37 °C, spectrophotometric analyses including UV-Vis absorption and SERS were conducted to characterize optical responses.

### **Serum Glutathione Detection**

Serum samples were donated by healthy volunteers from the Affiliated Hospital of Hunan Normal University, with informed consent obtained from all participants prior to collection. This study was approved by the Hunan Normal University Biomedical Research Ethics Committee (Reference No.2025-451). Blood samples were diluted 1,000-fold using PBS buffer (10 mM, pH 7.4) and stored at -20°C. For spiked serum samples, GSH standard solution was added to the real samples. The testing procedure for both real and spiked samples was consistent with the previously described protocols for glucose and glutathione.

### **SERS Measurements**

Horiba JY LabRAM HR Evolution Raman spectrometer was used in this paper. A 532 nm laser was employed for excitation with a power of 0.5 mW and a  $\times 100$  objective. Spectra were collected for 10 s at each point, with the laser focused on a spot of approximately 4 mm in diameter. The spectrometer was calibrated using the characteristic peak at 520  $\text{cm}^{-1}$  of a silicon wafer. MB ( $10^{-4}$  M to  $10^{-7}$  M) was used as the Raman probe to assess the SERS activity of the samples.

### **Calculation of SERS enhancement factor (EF)**

We use enhancement factor (EF) to further quantify the SERS performance of substrates by the following equation:

$$EF = \frac{I_{SERS}/N_{SERS}}{I_{RS}/N_{RS}}$$

where  $I_{SERS}$  and  $I_{RS}$  represent the intensity of SERS spectra and normal Raman spectra, respectively, and  $N_{SERS}$  and  $N_{RS}$  represent the average number of molecules within the laser spot excited by SERS and normal Raman, respectively. Here, the  $N_{RS}/N_{SERS}$  values are estimated from the ratio of the respective molecular concentrations. The minimum detected concentration of VN@C is  $10^{-6}$  M and the peak SERS intensity at 1607  $\text{cm}^{-1}$  is 130, while the intensity of  $10^{-2}$  M MB in normal Raman spectra is 467 on the glass slide.  $EF = (I_{SERS}/N_{SERS}) / (I_{RS}/N_{RS}) = (130/10^{-6}) / (467/10^{-2}) = 2.8 \times 10^3$ . However, the detected concentration of P-VN@C is  $10^{-6}$  M and the SERS peak intensity at 1607  $\text{cm}^{-1}$  is 3035, while the intensity of  $10^{-2}$  M MB in normal Raman spectra on the glass slide is 467. So,  $EF = (I_{SERS}/N_{SERS}) / (I_{RS}/N_{RS}) = (3035/10^{-6}) / (467/10^{-2}) = 6.5 \times 10^4$

### **Electronic Structure Computation**

All DFT computations were performed using the Vienna ab initio simulation package (VASP). The exchange-correlation interactions were treated with the Perdew-Burke-Ernzerhof (PBE) generalized gradient approximation. A plane-wave basis set with 450 eV kinetic energy cutoff was employed. The Monkhorst-Pack K-points grid was set to  $2\pi \times 0.03 \text{ \AA}^{-1}$  and  $2\pi \times 0.02 \text{ \AA}^{-1}$  for geometry optimizations and electronic structure calculations, respectively. The convergence criterions of the total energy and residual

Hellmann–Feynman force were set to  $10^{-4}$  eV and  $0.02$  eV  $\text{\AA}^{-1}$  for structural optimizations.

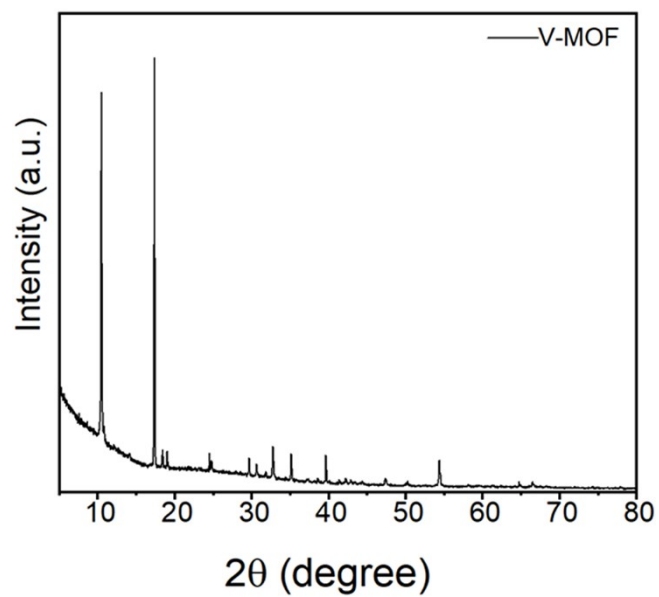

Figure S1. XRD pattern of V-MOF nanowires.

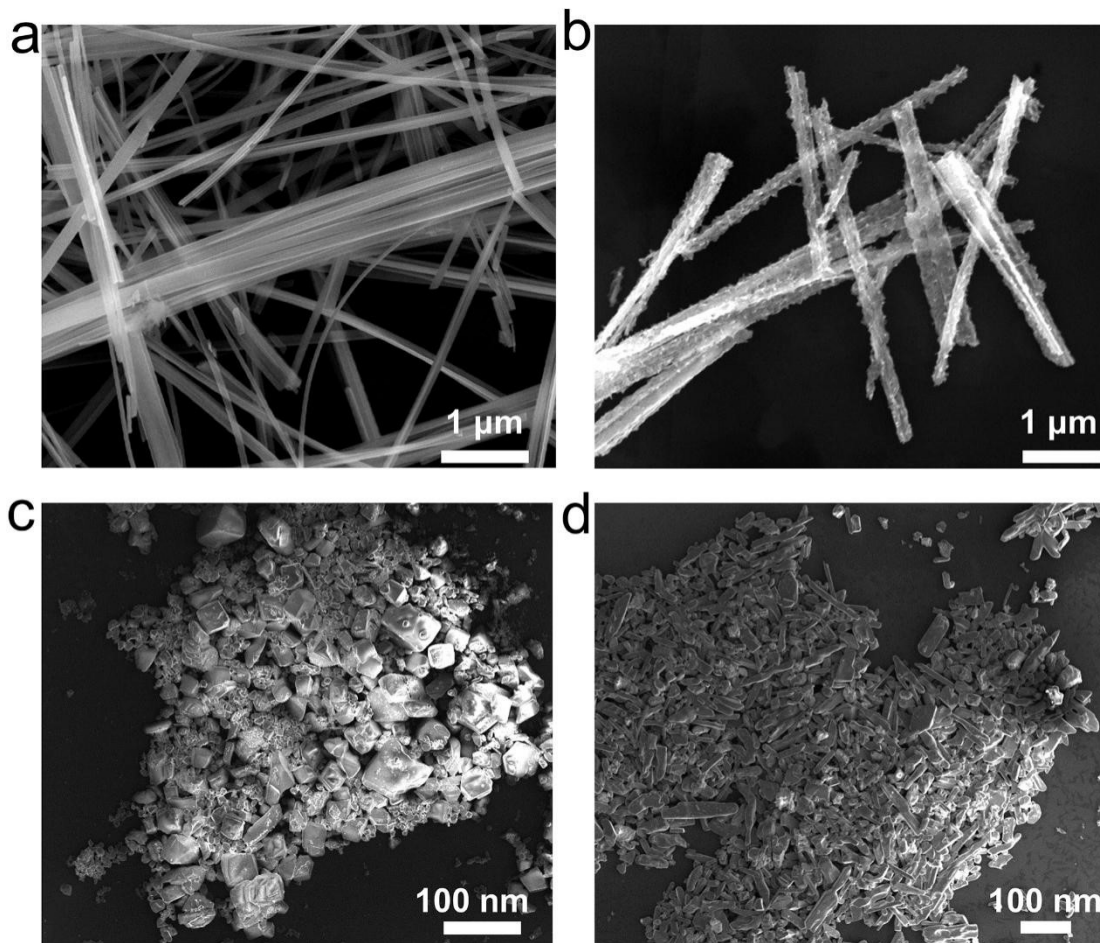

Figure S2. SEM images of VN@C prepared at different temperature. (a) 400 °C; (b) 600 °C; (c) 700 °C; (d) 800 °C.

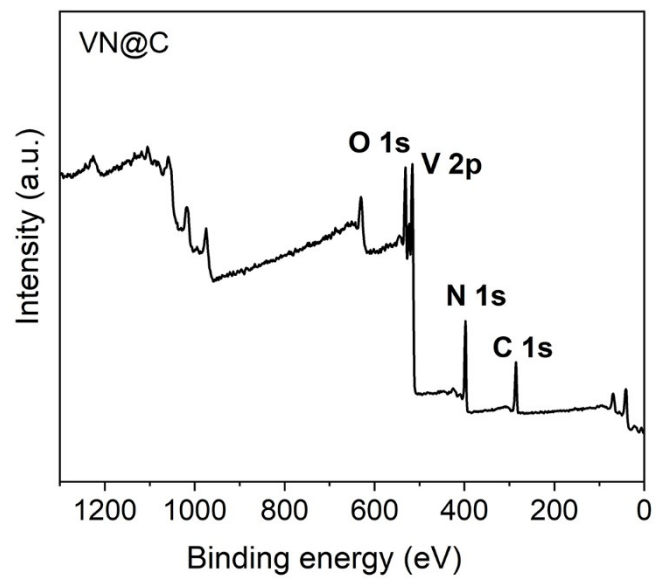

Figure S3. XPS survey spectra of VN@C.

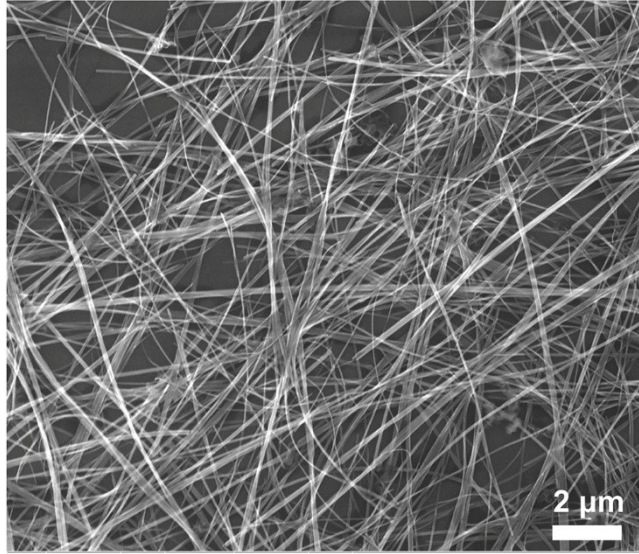

Figure S4. SEM image of VN@C nanowires.

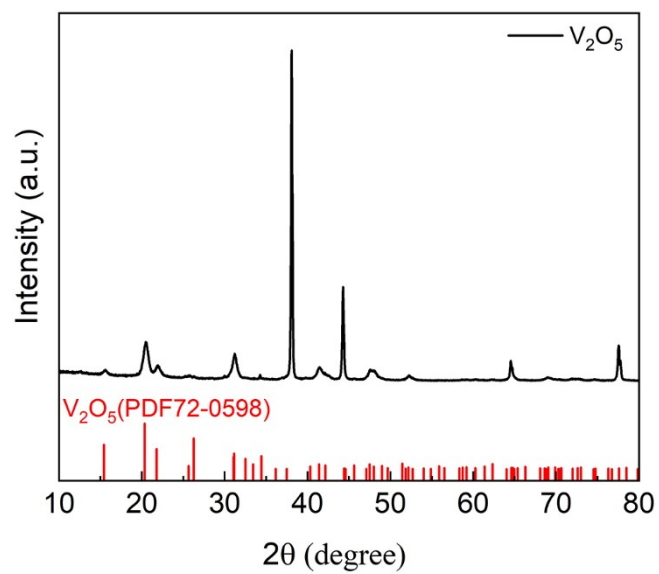

Figure S5. XRD pattern of V<sub>2</sub>O<sub>5</sub> nanowires

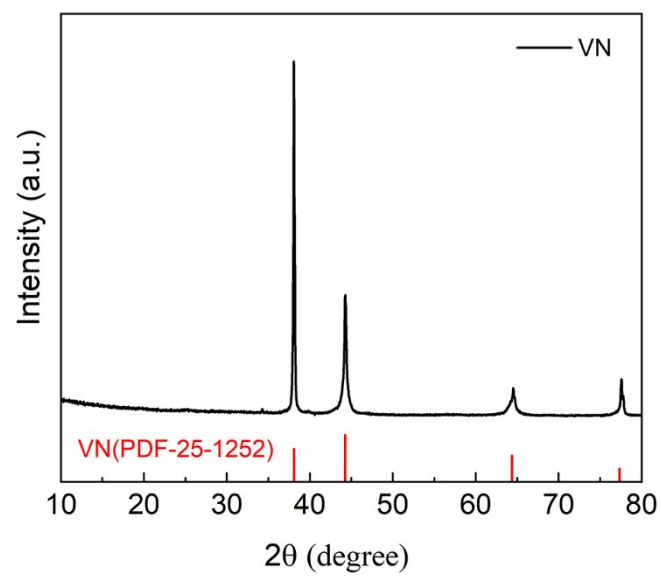

Figure S6. XRD pattern of VN.

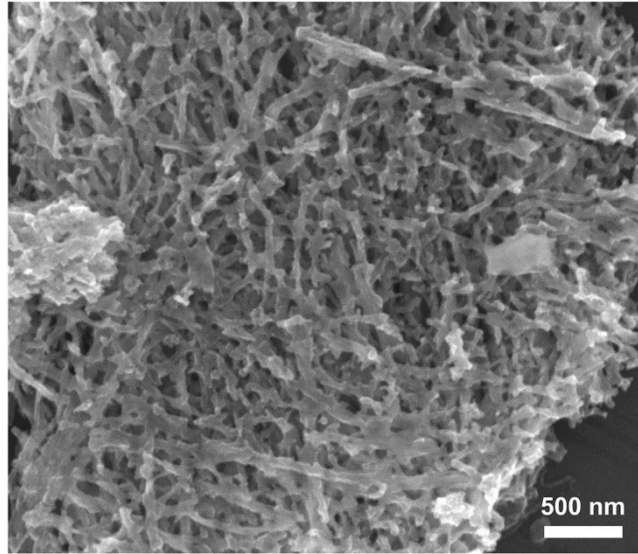

Figure S7. SEM image of VN.

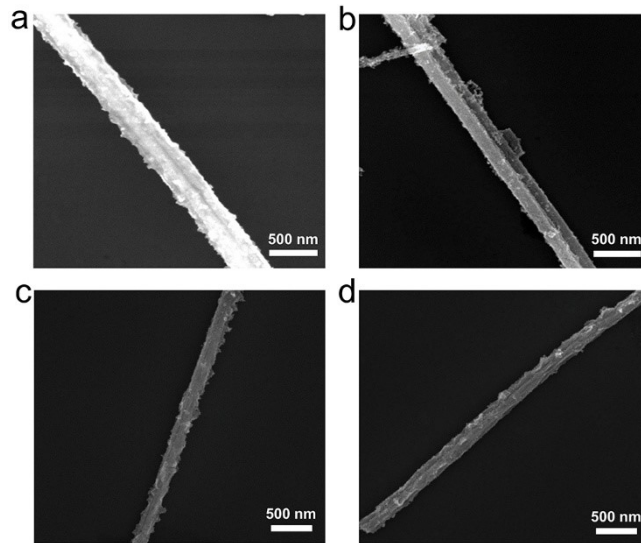

Figure S8. SEM image of P-VN@C generated with  $\text{NaH}_2\text{PO}_2$  of varying masses. (a) 5 mg, (b) 25 mg, (c) 50 mg, (d) 100 mg.

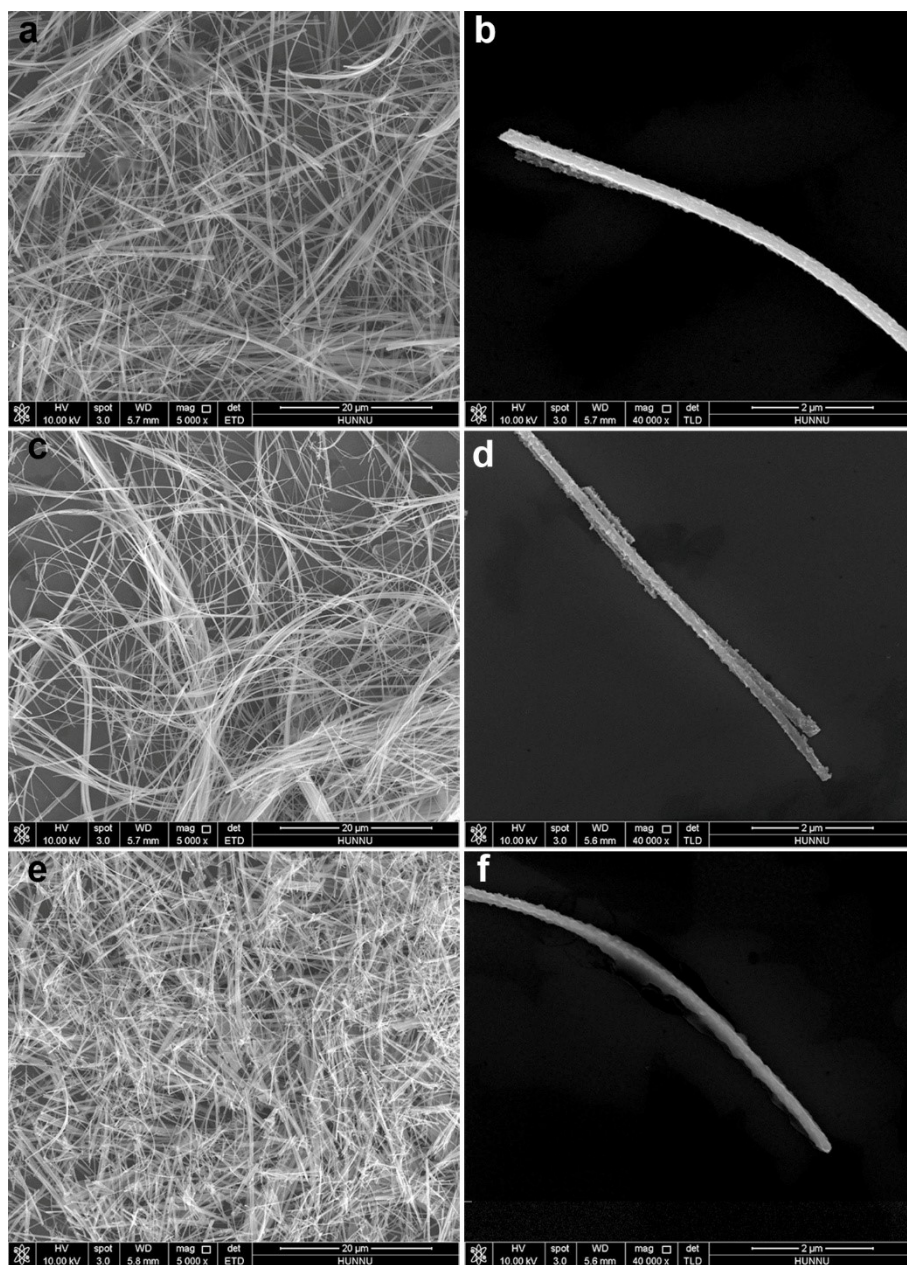

Figure. S9. SEM images of P-VN@C nanowire prepared at different temperature. (a, b) 200°C; (c, d) 300°C; (e, f) 400°C.

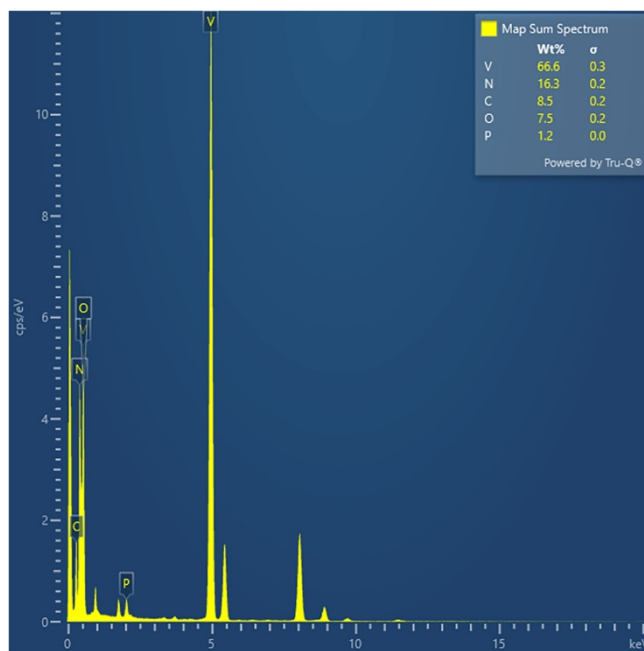

Figure. S10. The EDX spectrum of P-VN@C nanowires.

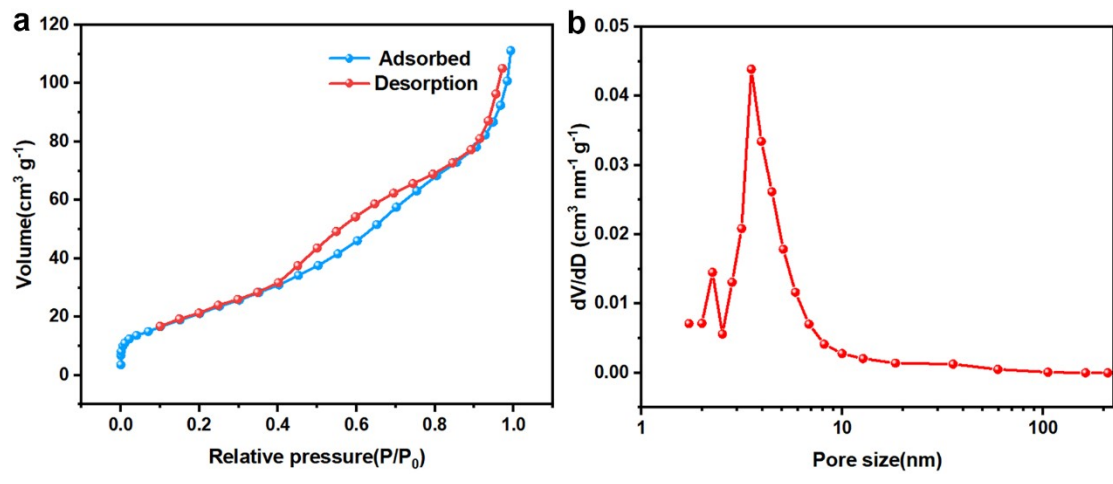

Figure S11. N<sub>2</sub> adsorption-desorption isotherms and the pore-size distribution of P-VN@C.

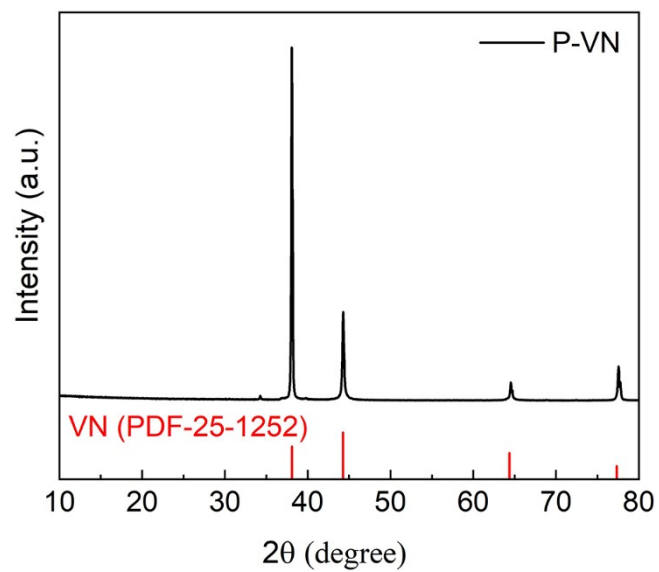

Figure S12. XRD pattern of VN.

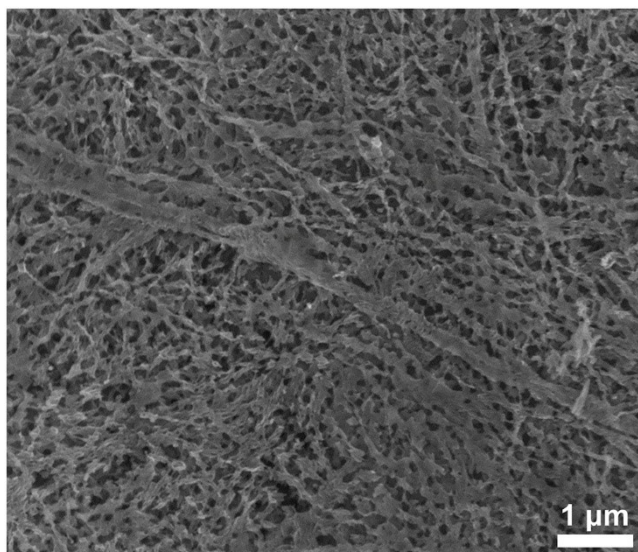

Figure S13. SEM image of P-VN.

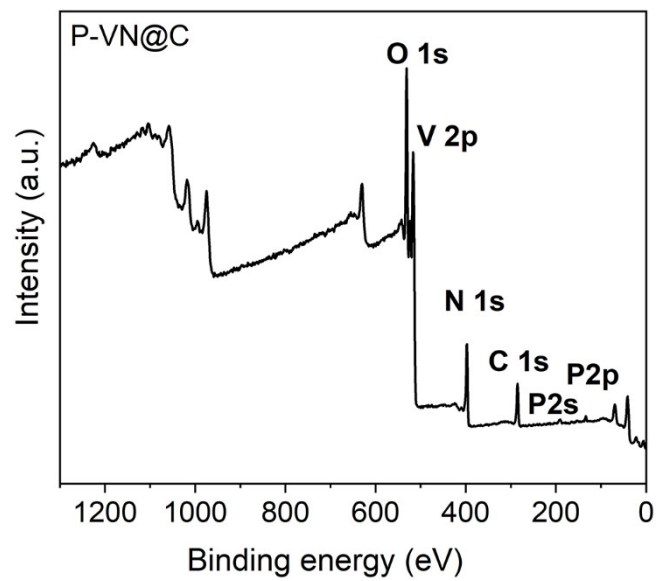

Figure S14. XPS survey spectra of P-VN@C.

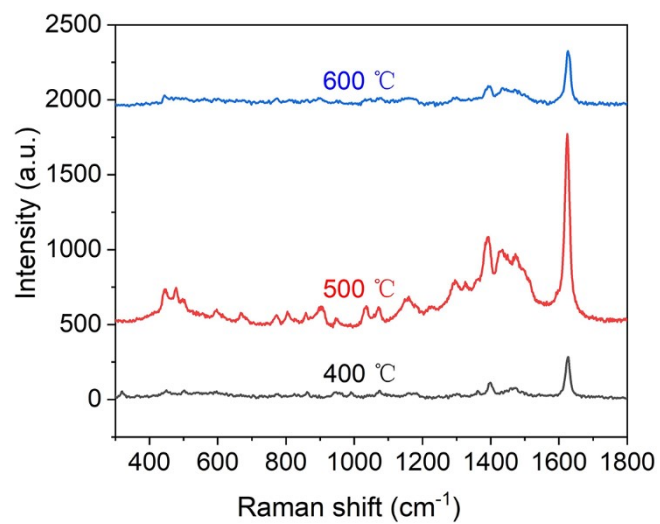

Figure S15. SERS spectra of  $10^{-5}$  M MB detected on VN@C with different reaction temperature.

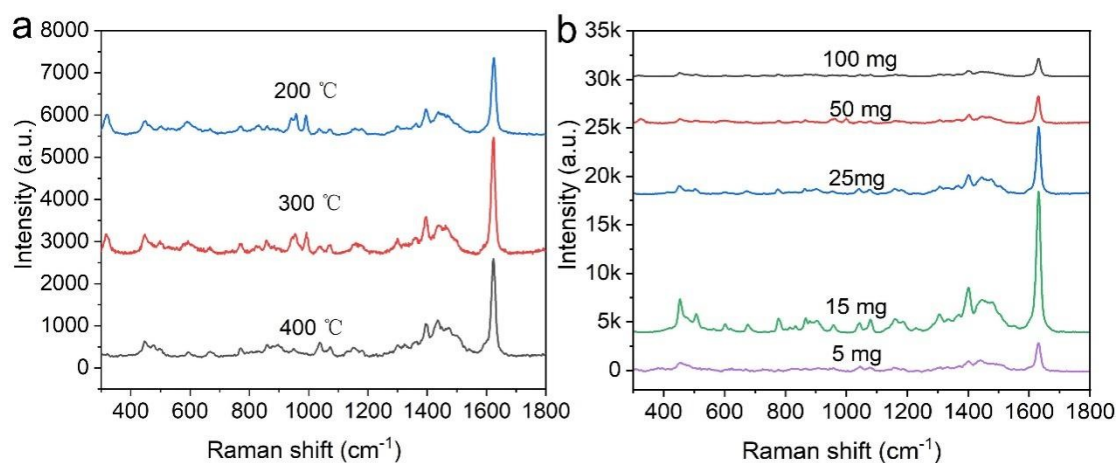

Figure S16. (a) SERS spectra of 10<sup>-5</sup> M MB detected on P-VN@C with different reaction temperature and (b) different NaH<sub>2</sub>PO<sub>2</sub> masses.

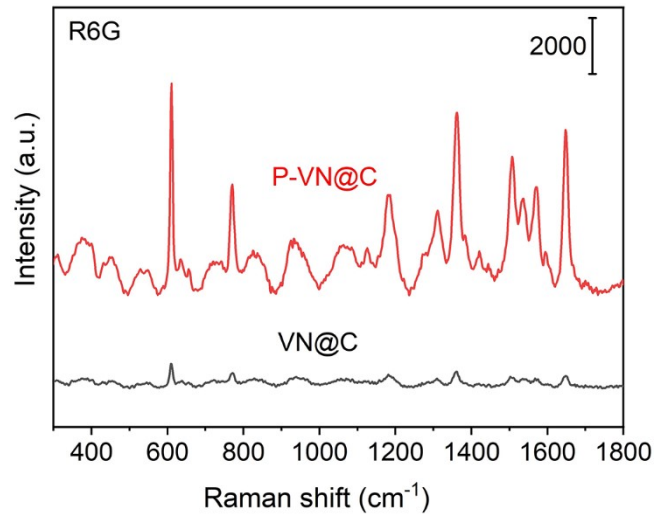

Figure S17. SERS spectra of R6G molecules absorbed on P-VN@C and VN@C.

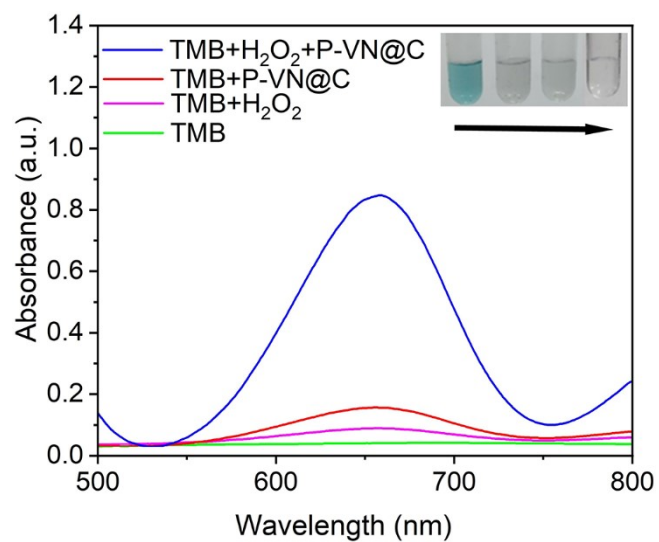

Figure S18. UV-vis spectra for the oxidation reaction of TMB catalyzed by P-VN@C.

The inset shows optical images of the solution color change with increasing GSH concentration.

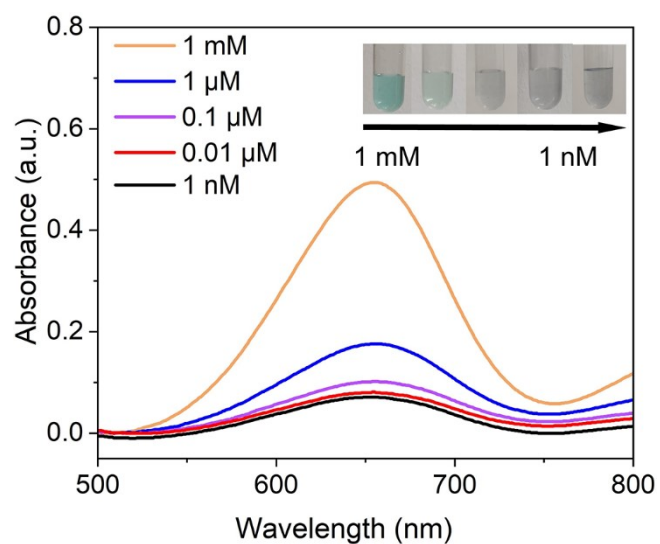

Figure S19. UV-vis spectra for the oxidation reaction of TMB catalyzed by P-VN@C with different concentrations of H<sub>2</sub>O<sub>2</sub>. The inset shows optical images of the solution color change with increasing H<sub>2</sub>O<sub>2</sub> concentration.

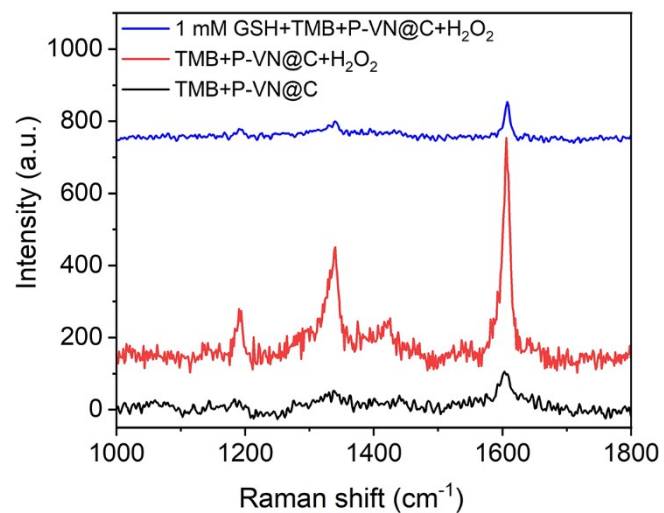

Figure S20. SERS spectra collected on TMB + P-VN@C, and TMB + VN@C + H<sub>2</sub>O<sub>2</sub>, and 1mM GSH + TMB + VN@C + H<sub>2</sub>O<sub>2</sub>.

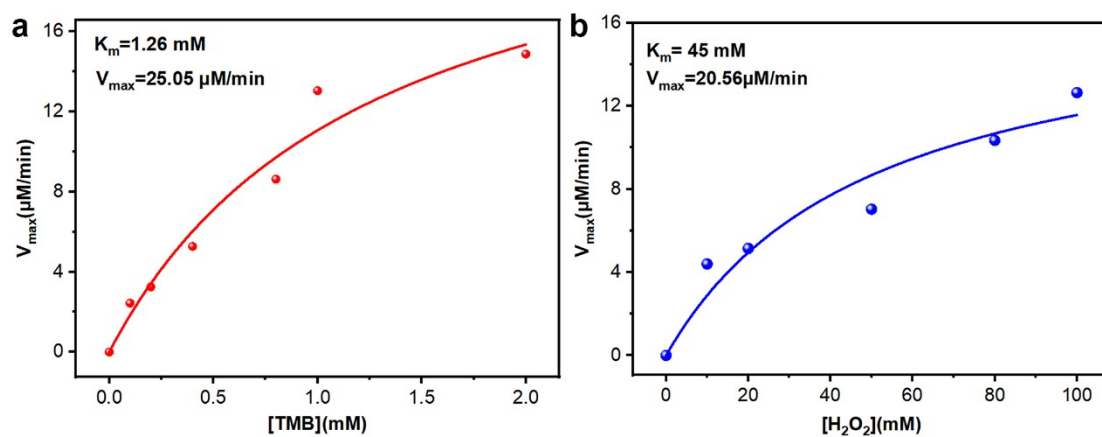

Figure S21. Michaelis–Menten kinetics of P-VN@C nanozymes with (a) varying TMB concentration in 0–2 mM and keeping a  $\text{H}_2\text{O}_2$  concentration of 10 mM; (c) varying  $\text{H}_2\text{O}_2$  concentration in 0–100  $\mu\text{M}$  and keeping a TMB concentration of 1 mM.

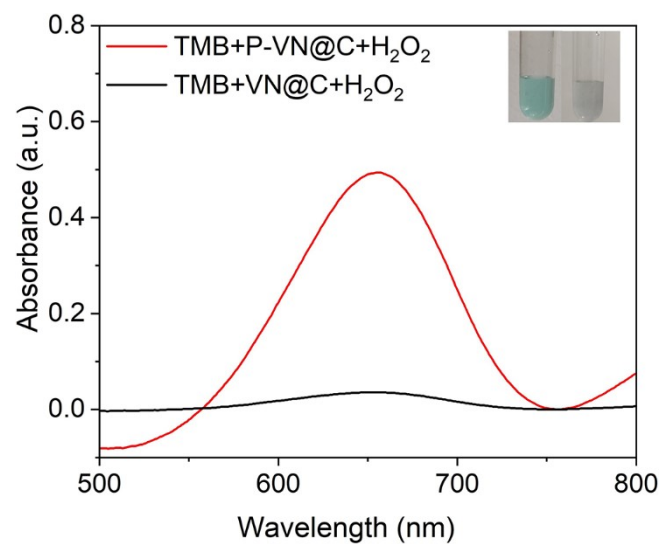

Figure S22. UV-Vis spectra of TMB + P-VN@C + H<sub>2</sub>O<sub>2</sub> and TMB + VN@C + H<sub>2</sub>O<sub>2</sub>.

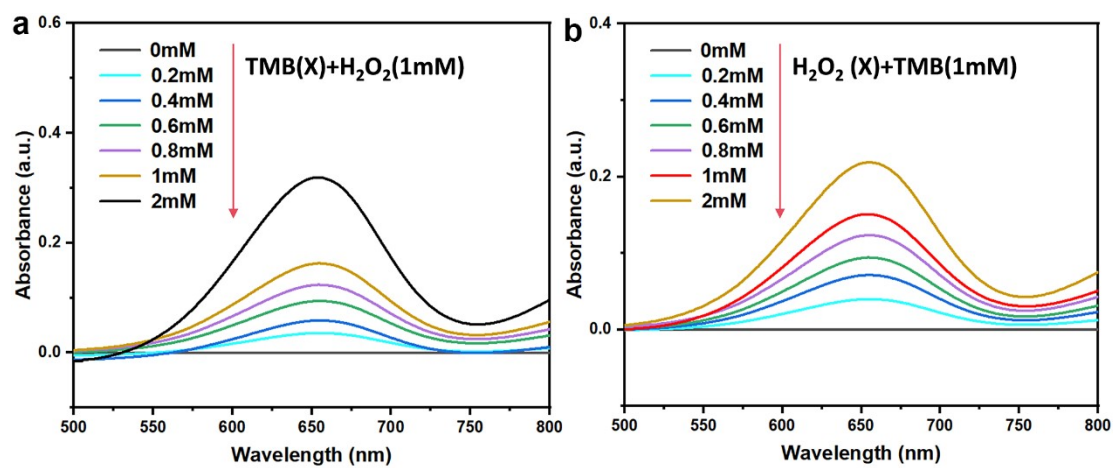

Figure S23. UV-vis spectra collected on (a) P-VN@C + H<sub>2</sub>O<sub>2</sub> (1 mM) + TMB (x mM), (b) P-VN@C + H<sub>2</sub>O<sub>2</sub> (x mM) + TMB (1 mM).

Table S1 Comparison of GSH performance detected by different methods

| Catalyst                             | Linear Range ( $\mu\text{M}$ ) | LOD ( $\mu\text{M}$ ) | Ref.      |
|--------------------------------------|--------------------------------|-----------------------|-----------|
| COF-300-AR                           | 1-15                           | 1                     | S1        |
| AuVCs                                | 25-500                         | 9.80                  | S2        |
| CDs@ZIF-8                            | 0-100                          | 1.04                  | S3        |
| CoOOH                                | 33-1300                        | 13.7                  | S4        |
| Cu NCs                               | 1-150                          | 0.89                  | S5        |
| R-Fe <sub>3</sub> O <sub>4</sub> /Au | 5-200                          | 0.88                  | S6        |
| NIR fluorescent probe                | 0-180                          | 6.847                 | S7        |
| P-VN@C                               | 1-100                          | 1                     | This work |

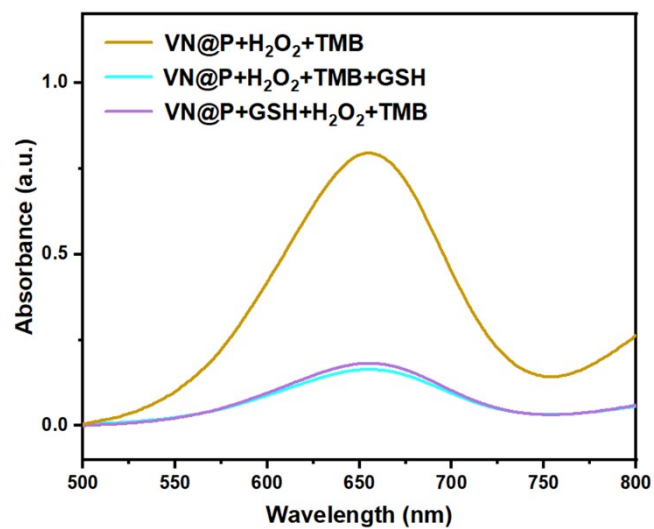

Figure S24. UV-vis spectra collected on P-VN@C + H<sub>2</sub>O<sub>2</sub> + TMB, P-VN@C + H<sub>2</sub>O<sub>2</sub> + TMB+GSH, P-VN@C +GSH+ H<sub>2</sub>O<sub>2</sub> + TMB.

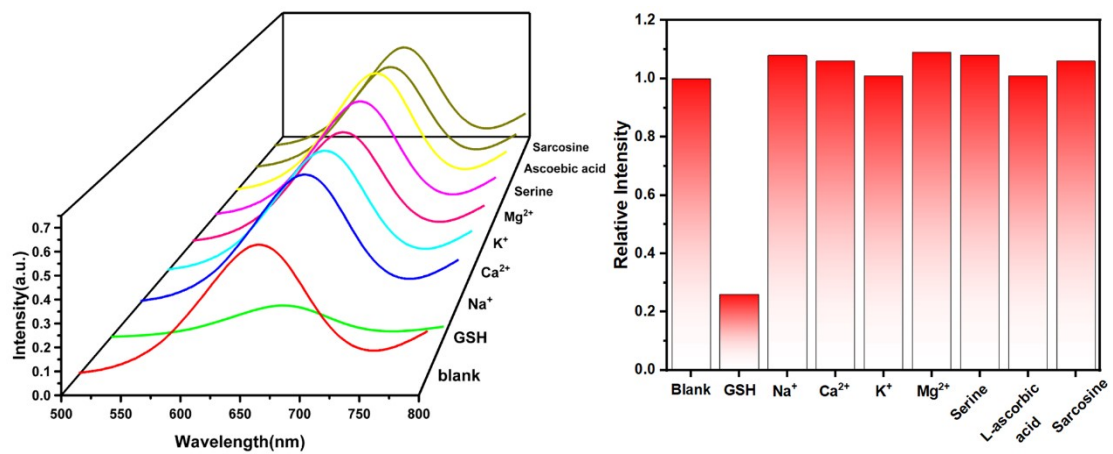

Figure S25. Selectivity of P-VN@C nanowires for GSH detection.

## References

1. P. Jin, X. Niu, F. Zhang, K. Dong, H. Dai, H. Zhang, W. Wang, H. Chen and X. Chen. *ACS Appl. Mater. Interfaces*, 2020, **12**, 20414-20422.
2. H. Pang, Y. Ke, N. Li, Y. Chen, C. Huang, K. Wei and H. Yang. *Biosens Bioelectron*, 2020, **165**, 112325.
3. Y. Wang, X. Liu, M. Wang, X. Wang, W. Ma and J. Li. *Sensor Actuat B-Chem*, 2021, **329**, 129115.
4. J. Li, L. Jiao, W. Xu, H. Yan, G. Chen, Y. Wu, L. Hu and W. Gu. *Sensor Actuat B-Chem*, 2021, **329**, 129247.
5. C. Liu, Y. Cai, J. Wang, X. Liu, H. Ren, L. Yan, Y. Zhang, S. Yang, J. Guo and A. Liu. *ACS Appl. Mater. Interfaces*, 2020, **12**, 42521-42530.
6. Y. Huang, Y. Gu, X. Liu, T. Deng, S. Dai, J. Qu, G. Yang and L. Qu. *Biosens Bioelectron*, 2022, **209**, 114253.
7. K. Xiong, F. Huo, J. Chao, Y. Zhang and C. Yin. *Anal. Chem.*, 2018, **91**, 1472–1478.
